# Supplementary material for: Cross-Linking Ligation and Sequencing of Hybrids (qCLASH) Reveals an Unpredicted miRNA Targetome in Melanoma Cells
Source: MDPI journal article supplement (doi:10.3390/cancers13051096), 2021-03-04
Supplement: s1 [file s1]

**Cross-linking ligation and sequencing of hybrids (qCLASH)  
reveals an unpredicted miRNA targetome in melanoma  
cells**

**Kozar *et al.*,**

***Supplements***

***Original western blot images corresponding to Figure 8B***

*Parts of the blot that are shown in the manuscript are  
highlighted by a red box*

*The original and non-annotated images are in the attached  
zipped folder*

CD68

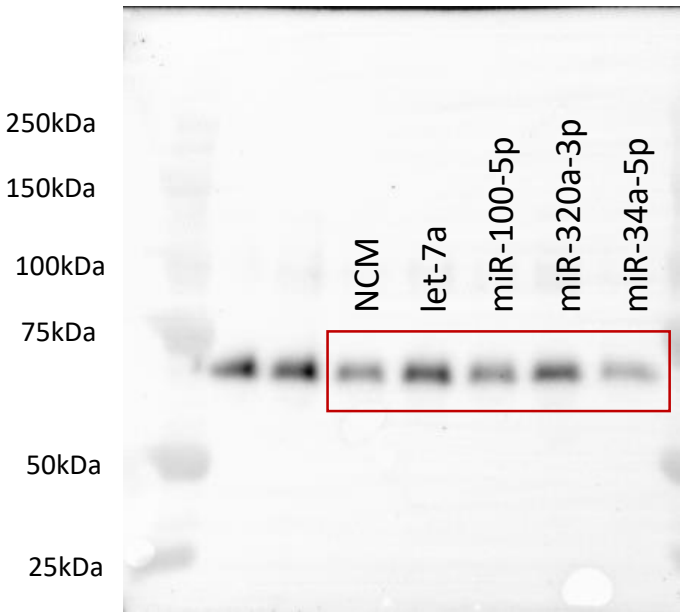

TUB

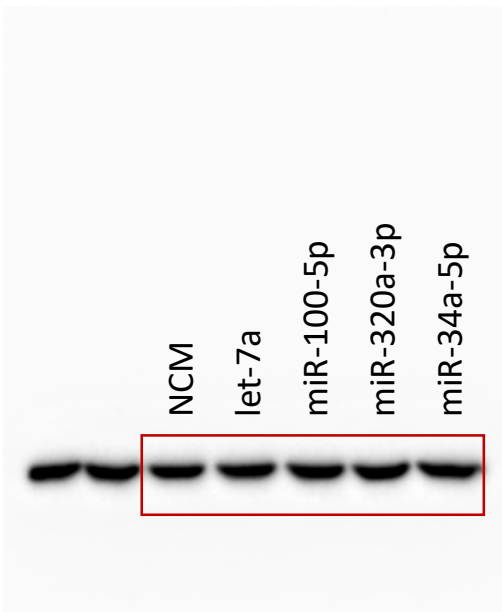

CD68

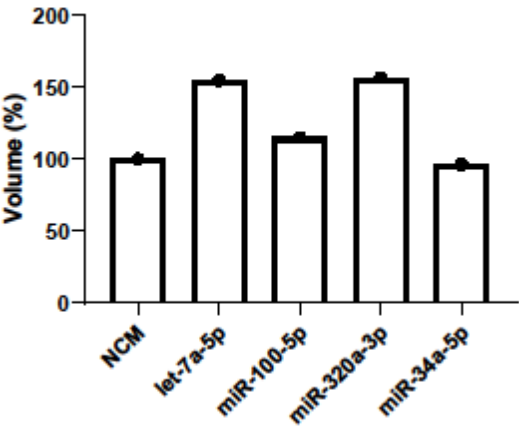

TUB

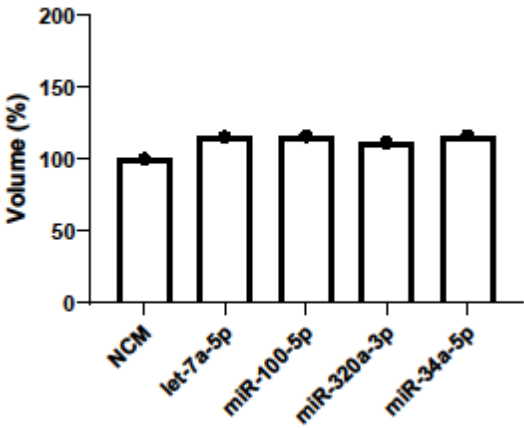

Protein bands have been quantified using the FusionCapt Advance software. The band intensity is expressed as the volume (%) relative to the intensity of the negative control mimic (NCM).

IGR37

CD68

TUB

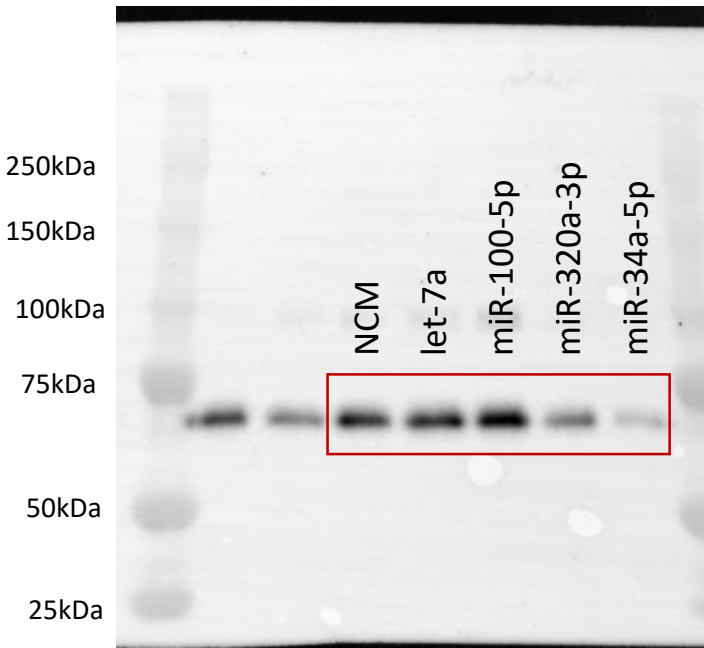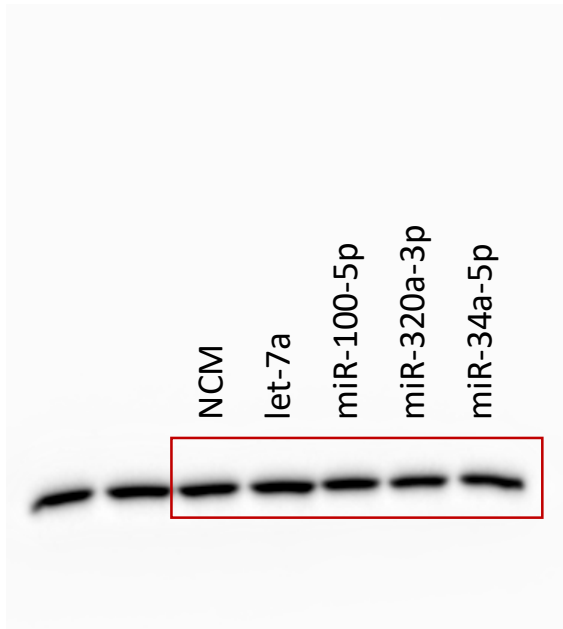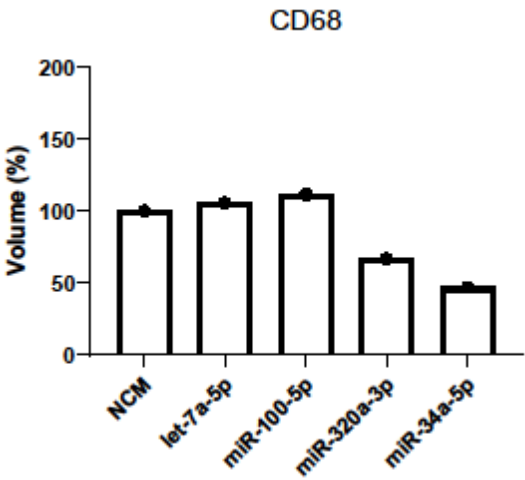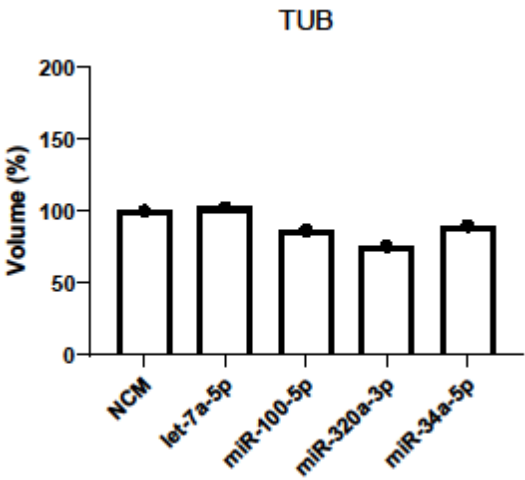

Protein bands have been quantified using the FusionCapt Advance software. The band intensity is expressed as the volume (%) relative to the intensity of the negative control mimic (NCM).

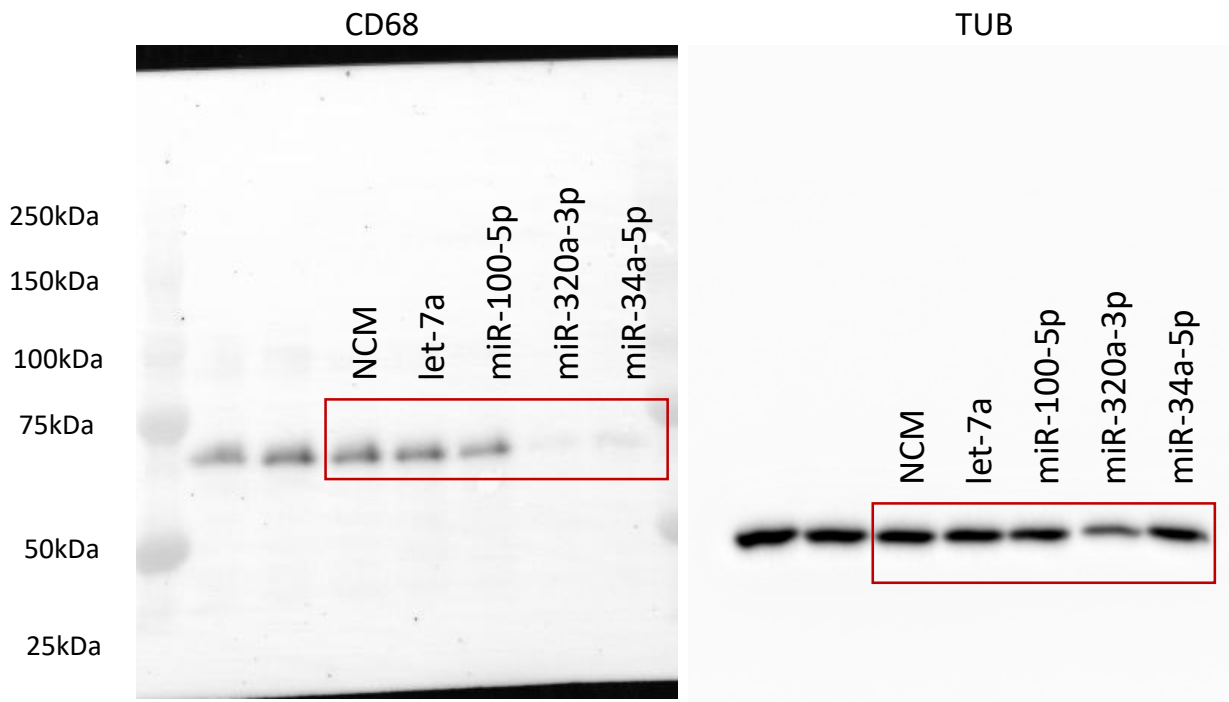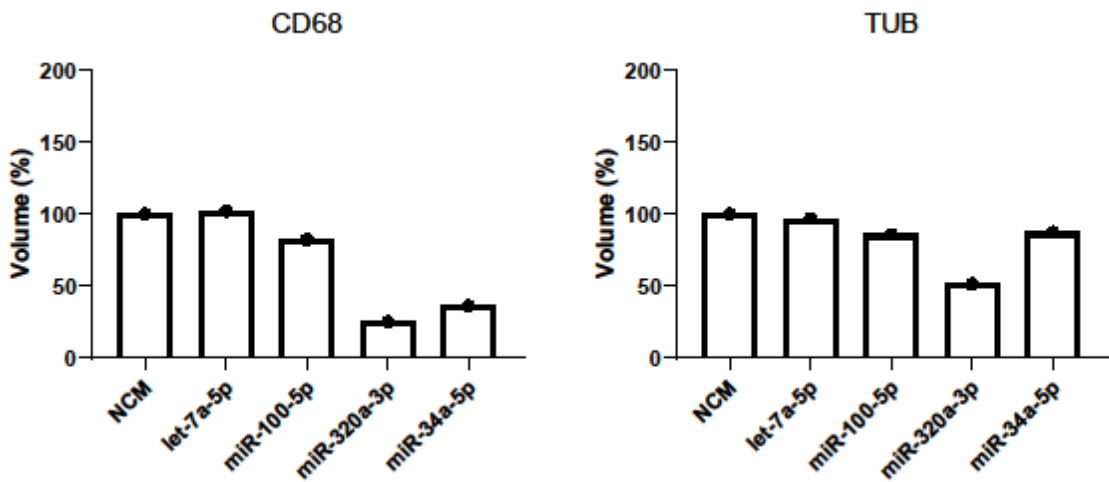

Protein bands have been quantified using the FusionCapt Advance software. The band intensity is expressed as the volume (%) relative to the intensity of the negative control mimic (NCM).

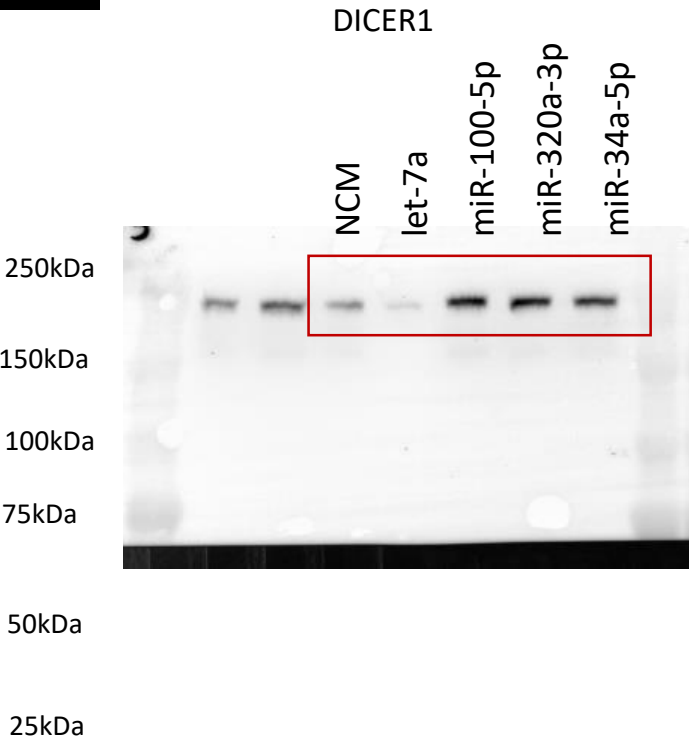

TUB

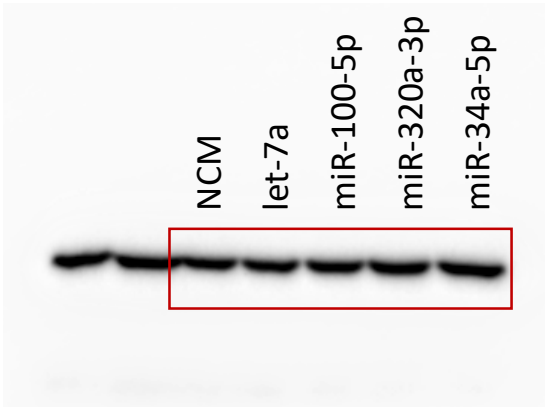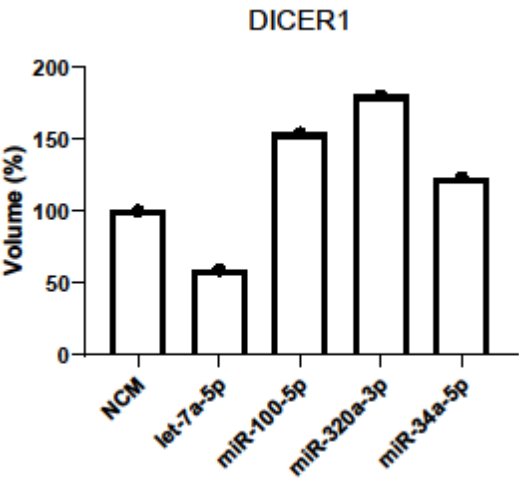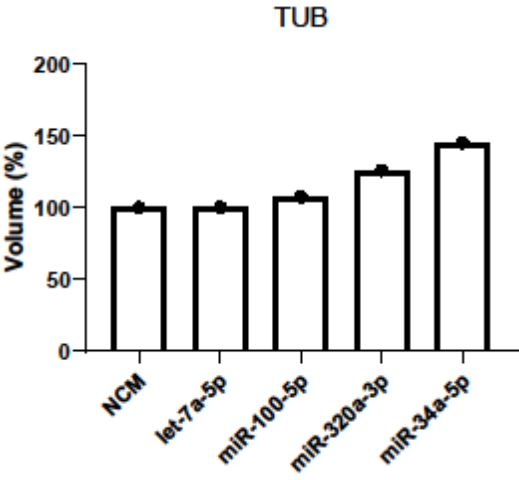

Protein bands have been quantified using the FusionCapt Advance software. The band intensity is expressed as the volume (%) relative to the intensity of the negative control mimic (NCM).

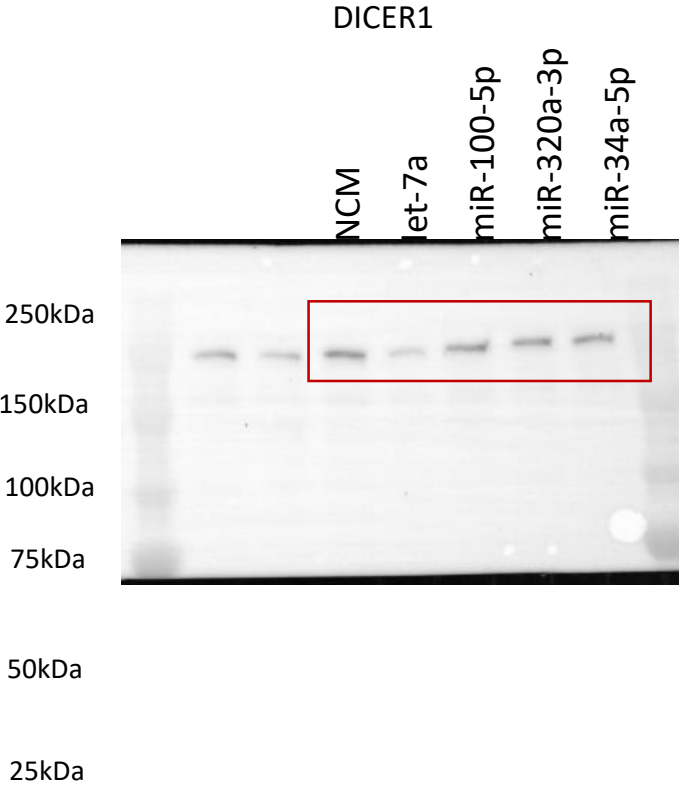

TUB

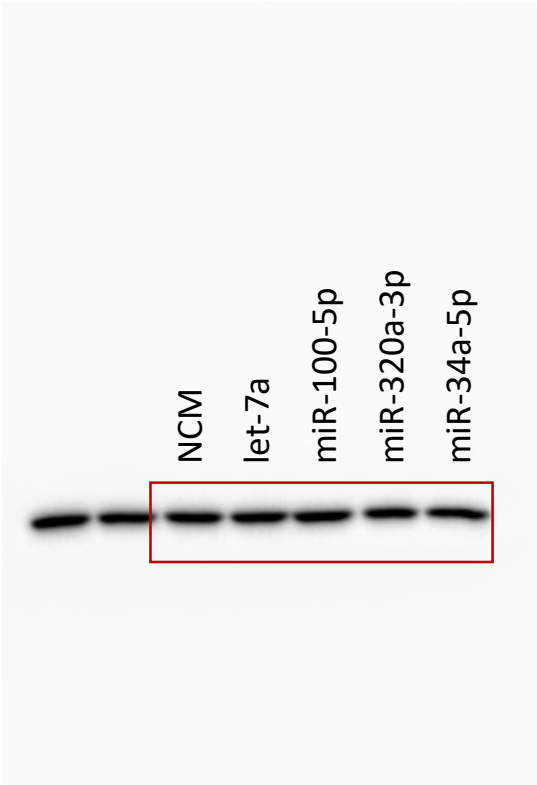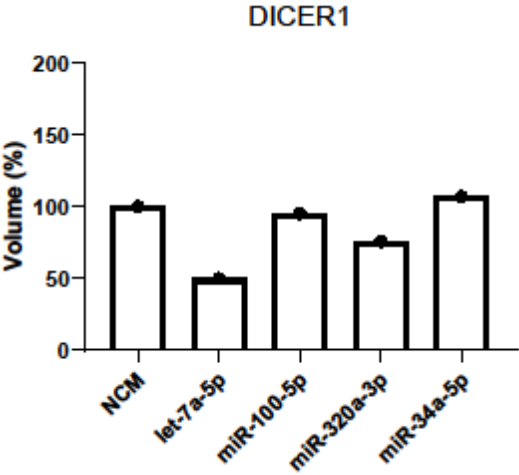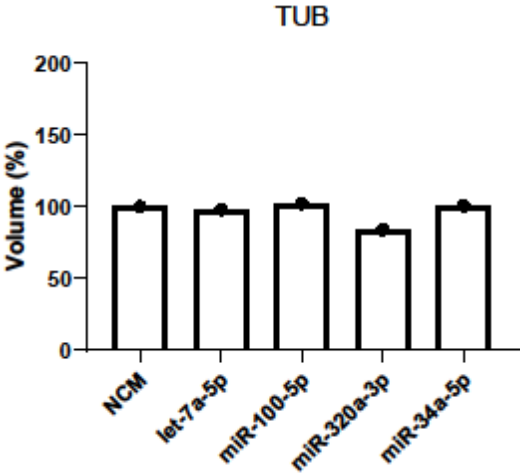

Protein bands have been quantified using the FusionCapt Advance software. The band intensity is expressed as the volume (%) relative to the intensity of the negative control mimic (NCM).

DICER1

TUB

NCM  
let-7a  
miR-100-5p  
miR-320a-3p  
miR-34a-5p

250kDa  
150kDa  
100kDa  
75kDa  
50kDa  
25kDa

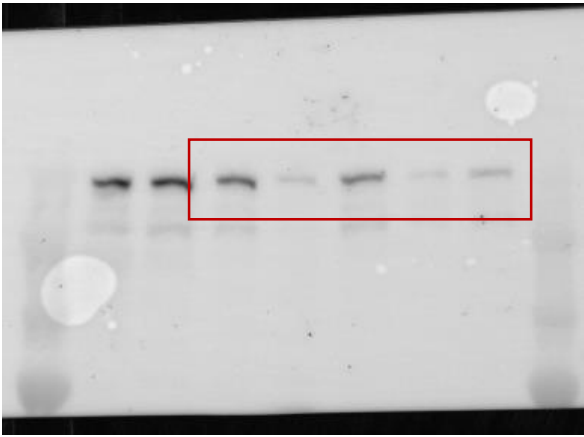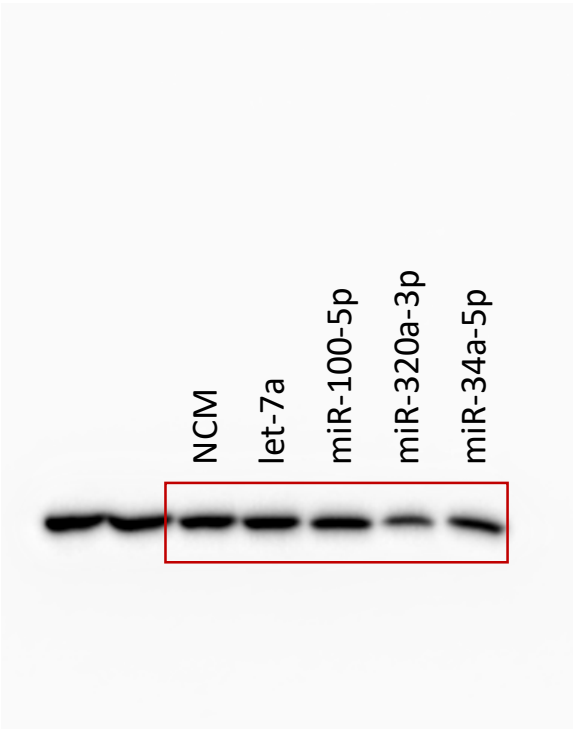

DICER1

TUB

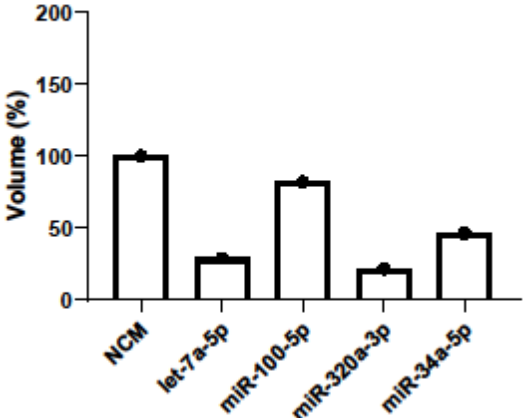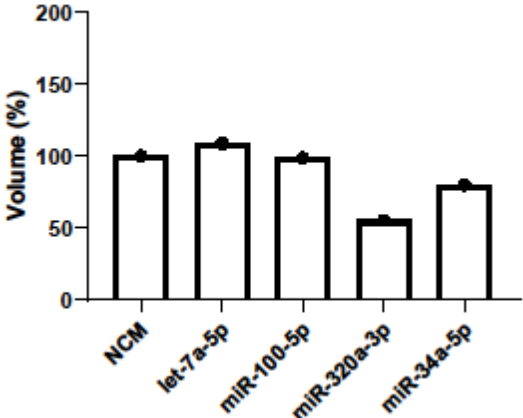

Protein bands have been quantified using the FusionCapt Advance software. The band intensity is expressed as the volume (%) relative to the intensity of the negative control mimic (NCM).
